# Supplementary material for: Headspace with Gas Chromatography-Mass Spectrometry for the Use of Volatile Organic Compound Profile in Botanical Origin Authentication of Honey
Source: MDPI journal article supplement (doi:10.3390/molecules28114297), 2023-05-24
Supplement: s1 [file s1]

# Headspace with Gas Chromatography-Mass Spectrometry for the Use of Volatile Organic Compound Profile in Botanical Origin Authentication of Honey

Ana Castell, Natalia Arroyo-Manzanares \*, Yolanda Guerrero-Núñez, Natalia Campillo and Pilar Viñas \*

Department of Analytical Chemistry, Faculty of Chemistry, Regional Campus of International Excellence "Campus Mare Nostrum", University of Murcia, E-30100 Murcia, Spain

\* Correspondence: natalia.arroyo@um.es (N.A.-M.); pilarvi@um.es (P.V.); Tel.: +34-868-887-415 (P.V.)

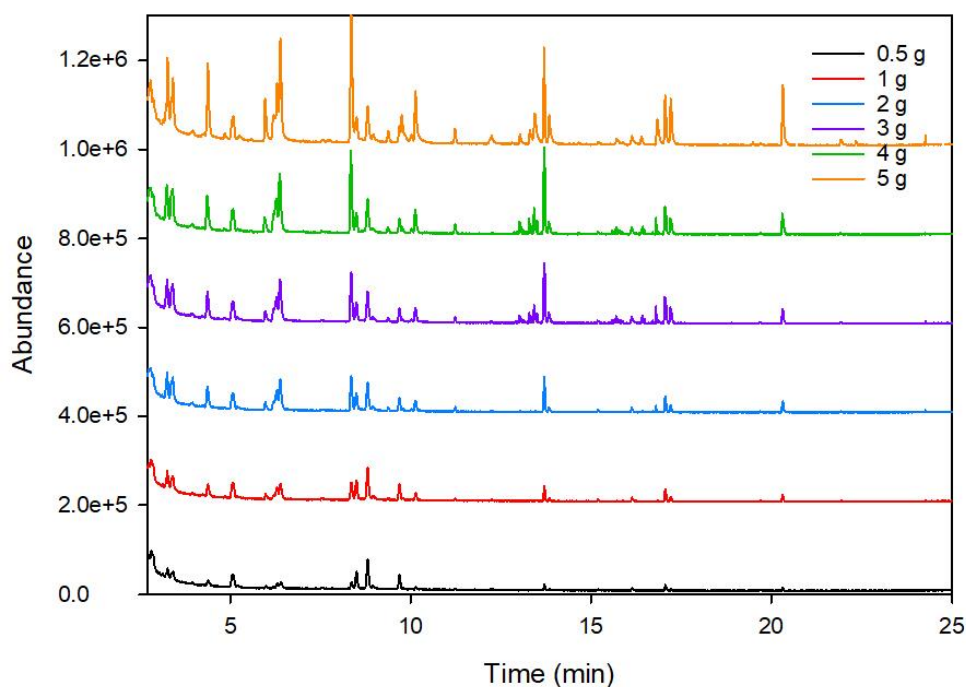

**Figure S1.** Total ion chromatogram of honey during sample amount optimisation by the proposed HS-GC-MS method.

**Table S1.** Validation rate of the proposed OPLS-DA model.

| Actual/<br>Prediction | Samples | Orange<br>blossom | Rosemary | Thousand<br>flowers | Albaida | Others | Correct<br>(%) |
|-----------------------|---------|-------------------|----------|---------------------|---------|--------|----------------|
| Orange blossom        | 2       | 2                 | 0        | 0                   | 0       | 0      | 100.0          |
| Rosemary              | 1       | 0                 | 0        | 1                   | 0       | 0      | 0.0            |
| Thousand flowers      | 3       | 0                 | 0        | 3                   | 0       | 0      | 100.0          |
| Albaida               | 1       | 0                 | 0        | 0                   | 1       | 0      | 100.0          |
| Others                | 5       | 0                 | 0        | 0                   | 0       | 5      | 100.0          |
| Total                 | 12      | 2                 | 0        | 4                   | 1       | 5      | 91.67          |

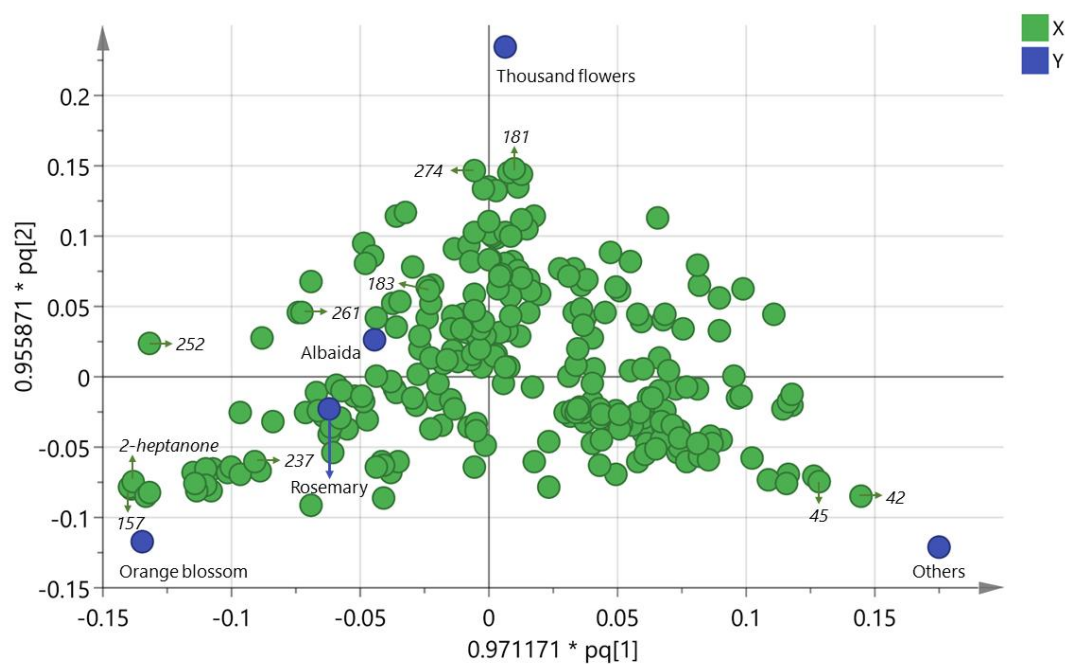

**Figure S2.** Loadings scatter plot of the proposed OPLS-DA model.
